# Supplementary material for: Prevalence and incidence of injuries in para athletes: a systematic review with meta-analysis and GRADE recommendations
Source: HighWire-hosted journal article supplement (doi:10.1136/bjsports-2020-102823), 2020-11-23

## Supplementary material 3

## Meta-analysis for overall injuries prevalence in para athletes and subgroup analysis for studies with large and small sample size

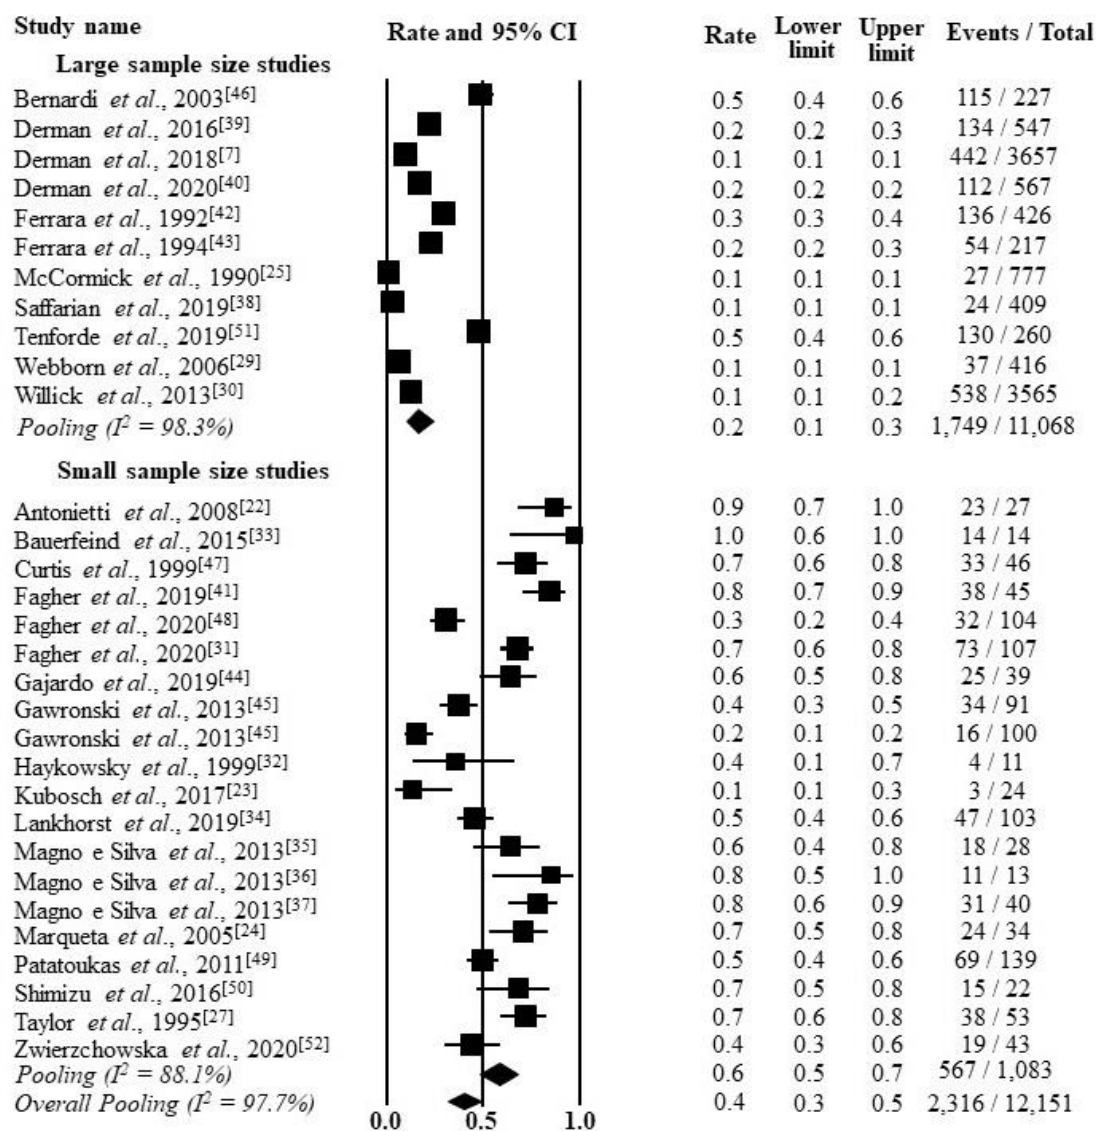

Supplement: bjsports-2020-102823supp003_data_supplement.pdf [file bjsports-2020-102823supp003_data_supplement.pdf]
